# Supplementary material for: Enhancing CVD graphene's inter-grain connectivity by a graphite promoter
Source: Royal Society of Chemistry journal article supplement (doi:10.1039/c5nr05972k), 2015-01-01
Supplement: c5nr05972k1.pdf [file c5nr05972k1.pdf]

## Supporting information

### Enhancing the inter-grain connectivity of CVD grown graphene by promoter caps

Ya-Ping Hsieh<sup>a\*</sup>, Yi-Jing Chiu<sup>a</sup>, and Mario Hofmann<sup>b</sup>

<sup>a</sup> Graduate of Institute of Opto-Mechatronics, National Chung Cheng University, 168,  
University Rd., Min-Hsiung, Chia-Yi, 62102, Taiwan

<sup>b</sup> Department of Material Science and Engineering, National Cheng Kung University,  
Tainan, 62102, Taiwan

E-mail: yphsieh@ccu.edu.tw

#### 1. Optical Micrographs of oxidation tests

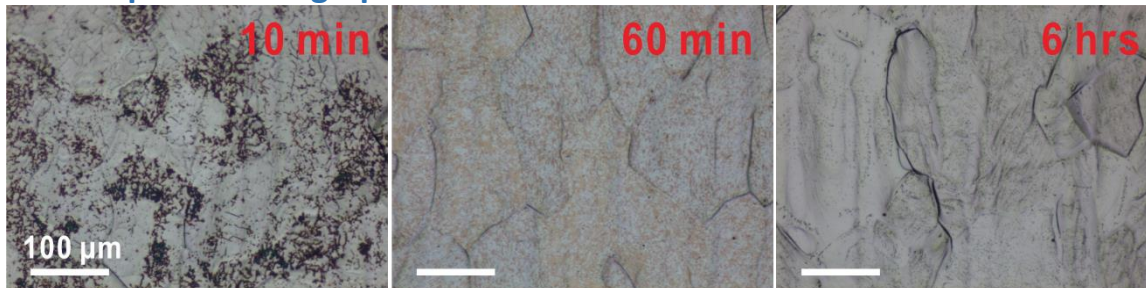

Figure S1: OM images of oxidized graphene for 10 min, 60 min and 6 hrs.

#### 2. High resolution characterization of graphene

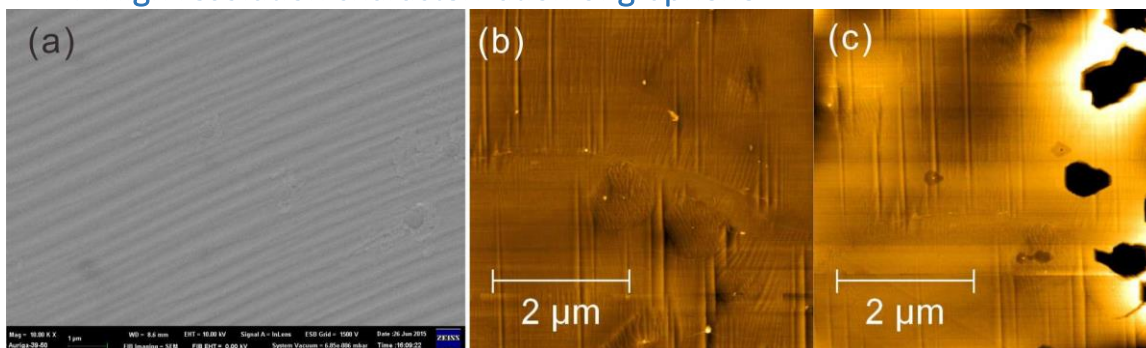

Figure S2: (a) SEM image of grown graphene, (b) AFM image of grown graphene, (c) identical area to (b) after FIFE

### 3. Comparison of different characterization methods

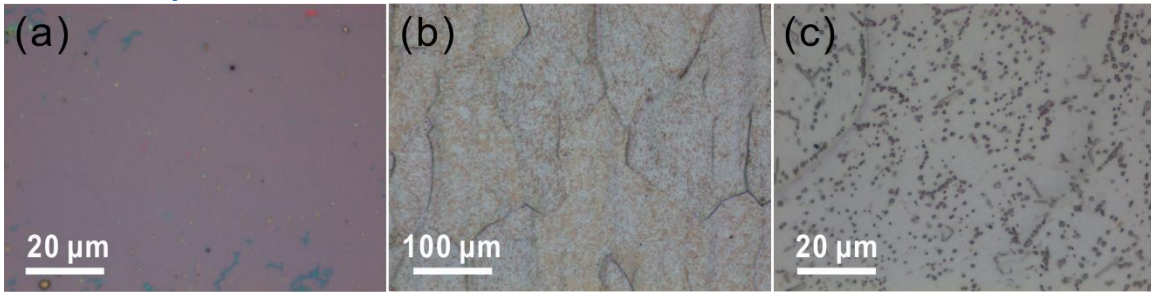

Figure S3: Characterization after 60 mins of growth (a) OM transferred, (b) air oxidized (c) APS etching.

### 4. Extended characterization of graphene

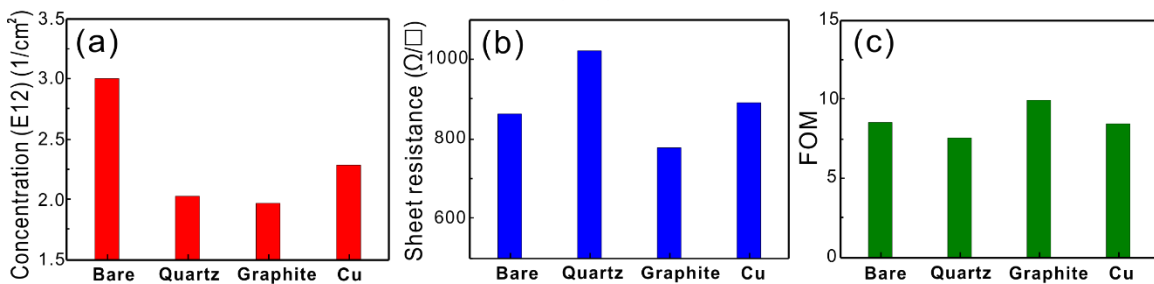

Figure S4: (a) Carrier concentration, (b) sheet resistance and its (c) figure of merit as transparent optical conductor of the as grown graphene under different capping materials.

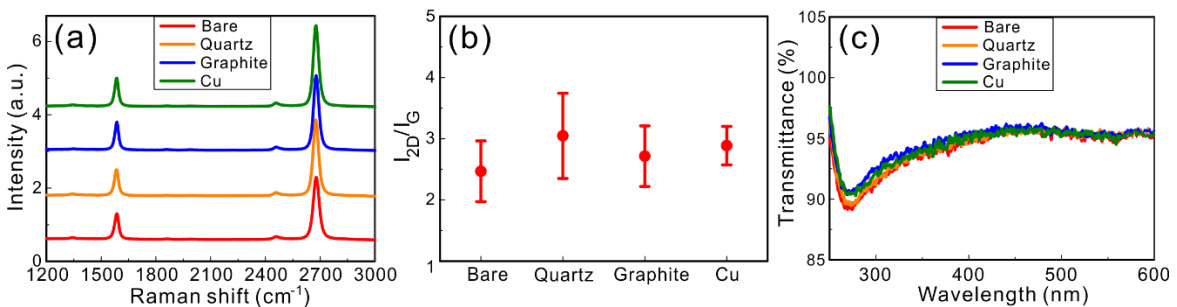

Figure S5: Raman spectrum and  $I_{2D}/I_G > 2.5$  suggesting uniform single layer of graphene were synthesized with graphite promoter.

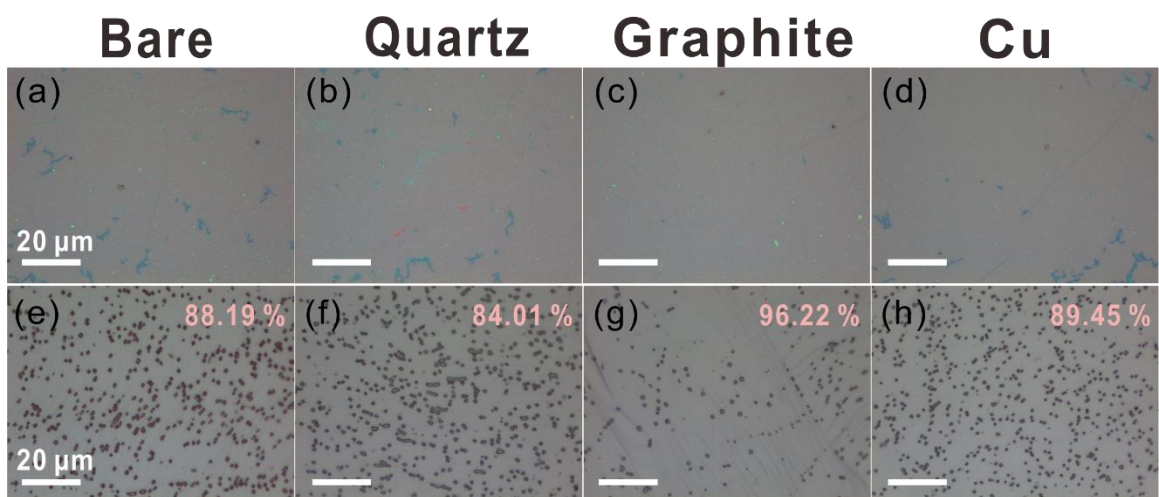

Figure S6: comparison of various cap (quartz, graphite and copper) and no cap (bare), (a-d) OM images after transfer on SiO<sub>x</sub> showing uniformity of graphene and (e-h) after APS etching on graphene/Cu.

### 5. Large scale uniformity of graphene

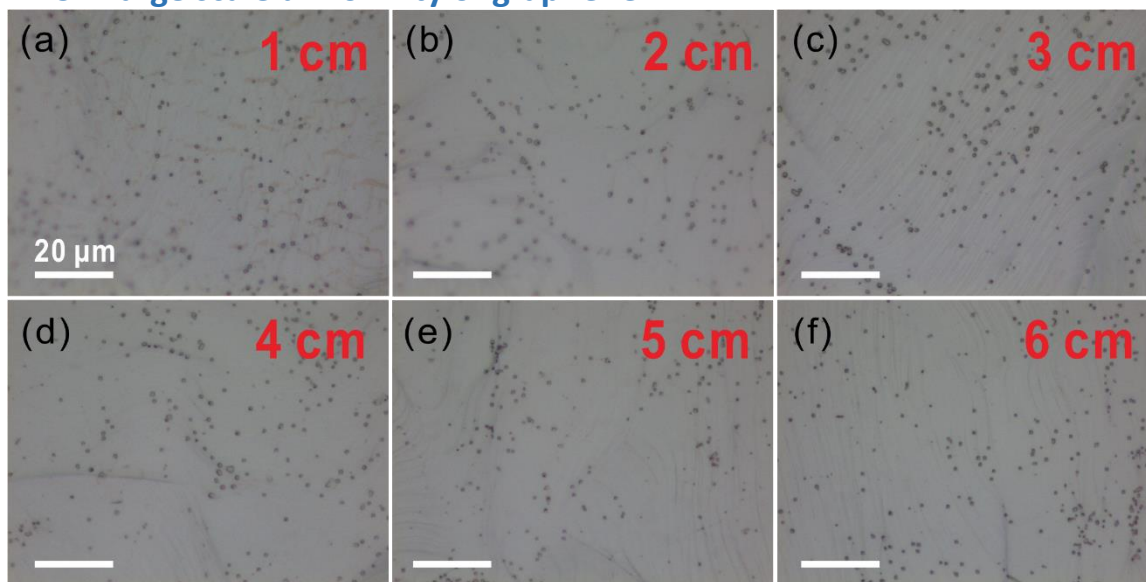

Figure S7: APS etching along x-direction after graphene growth with graphite promoter
